# Supplementary material for: A hemoglobin-based oxygen carrier sensitized Cisplatin based chemotherapy in hepatocellular carcinoma
Source: PubMed Central journal article supplement (PMC5689611; doi:10.18632/oncotarget.19672), 2017-07-28
Supplement: oncotarget-08-85311-s001.pdf [file oncotarget-08-85311-s001.pdf]

# A hemoglobin-based oxygen carrier sensitized Cisplatin based chemotherapy in hepatocellular carcinoma

## SUPPLEMENTARY MATERIALS

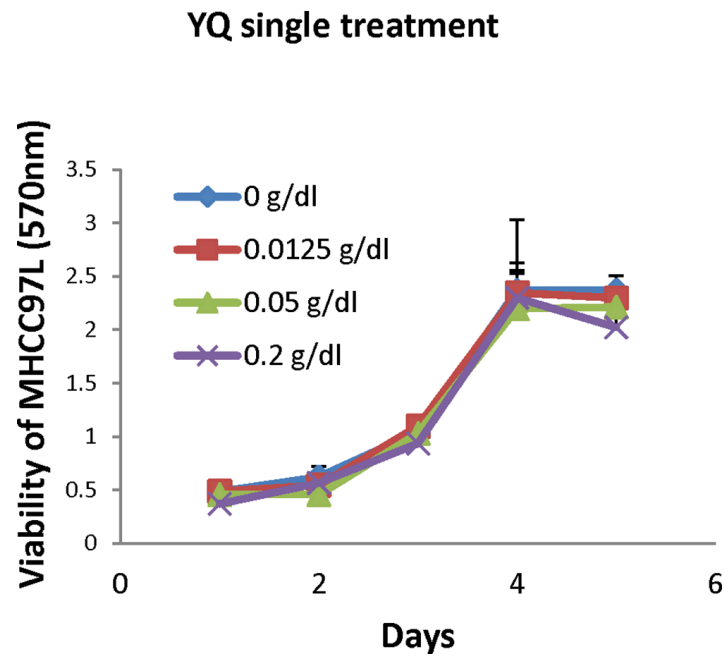

Supplementary Figure 1: No significant effect of single treatment of YQ23 was observed in HCC cells.
